# Supplementary material
Source: publisher figshare collection journal article supplement (https://rs.figshare.com/ndownloader/files/14413019)
Supplement: Supplementary file [file 14413019]

# **Supplementary materials**

featuring article

## **Limits to the rate of information transmission through MAPK pathway**

by

Frederic Grabowski<sup>1</sup>, Paweł Czyż<sup>2</sup>, Marek Kochańczyk<sup>3</sup> and Tomasz Lipniacki<sup>3</sup>

<sup>1</sup>Faculty of Mathematics, Informatics and Mechanics, University of Warsaw, Poland,

<sup>2</sup>University of Oxford, Oxford, UK,

<sup>3</sup>Institute of Fundamental Technological Research, Polish Academy of Sciences, Warsaw, Poland

### **Contents**

**Supplementary Figure 1. Influence of extrinsic noise on transmitted information.**

**Supplementary Figure 2. Influence of additive noise on transmitted information.**

**Supplementary Table 1. Parameter values for the MAPK pathway model.**

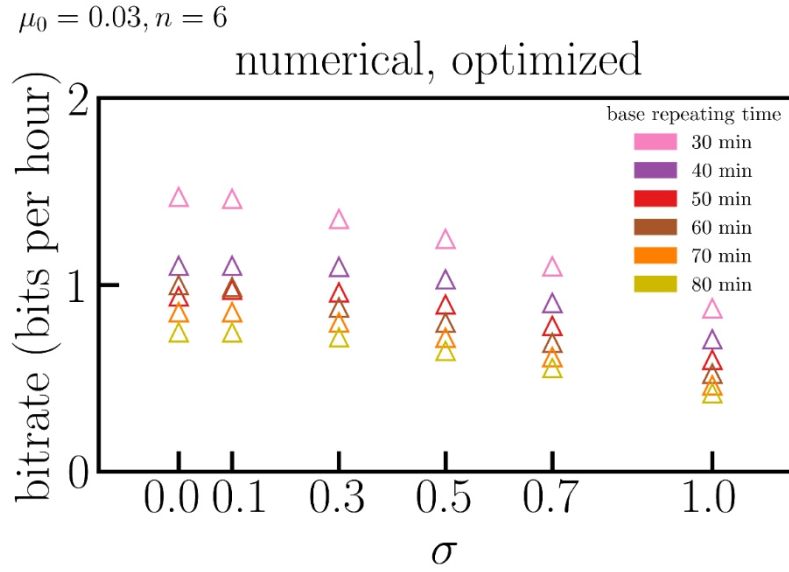

**Supplementary Figure 1.** Influence of cell specific noise on transmitted information. Mutual information was calculated numerically as follows: triangles – maximized, circles – assuming equal probabilities of all group representatives, squares – assuming equal probabilities of all input sequences.

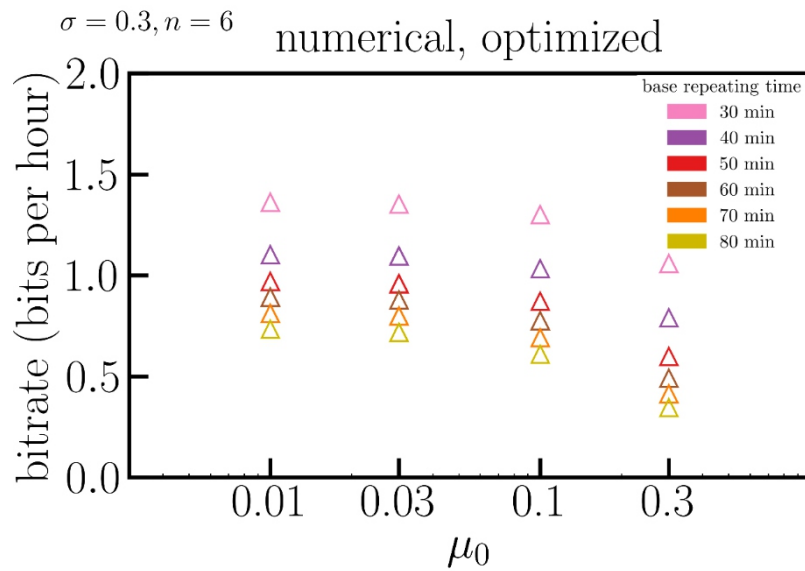

**Supplementary Figure 2.** Influence of additive noise on transmitted information. Mutual information was calculated numerically as follows: triangles – maximized, circles – assuming equal probabilities of all group representatives, squares – assuming equal probabilities of all input sequences.

## Supplementary Table 1. Parameter values for the MAPK pathway model.

Default values originate from the article by Kočańczyk *et al.* (2017), *Sci. Rep.*, 7:38244, doi:10.1038/srep38244.

The parameters of the pathway that are drawn from the lognormal distribution  $\text{LogN}(\mu_i, \sigma)$  are written in bold green.

| Parameter                                                                                                                                                     | Description                                                                                               |
|---------------------------------------------------------------------------------------------------------------------------------------------------------------|-----------------------------------------------------------------------------------------------------------|
| <i>Concentrations (protein copy number per cell)</i>                                                                                                          |                                                                                                           |
| <b>EGFR<sub>tot</sub> = <math>3 \times 10^5</math></b>                                                                                                        | Total number of EGFR molecules                                                                            |
| <b>RAS<sub>tot</sub> = <math>6 \times 10^4</math></b>                                                                                                         | Total number of RAS molecules                                                                             |
| <b>SOS<sub>tot</sub> = <math>10^5</math></b>                                                                                                                  | Total number of SOS molecules                                                                             |
| <b>RasGAP<sub>tot</sub> = <math>6 \times 10^3</math></b>                                                                                                      | Total number of RasGAP molecules                                                                          |
| <b>RAF<sub>tot</sub> = <math>5 \times 10^5</math></b>                                                                                                         | Total number of RAF molecules                                                                             |
| <b>MEK<sub>tot</sub> = <math>2 \times 10^5</math></b>                                                                                                         | Total number of MEK molecules                                                                             |
| <b>ERK<sub>tot</sub> = <math>3 \times 10^6</math></b>                                                                                                         | Total number of ERK molecules                                                                             |
| <i>Rate constant for fast processes (s<sup>-1</sup>)</i>                                                                                                      |                                                                                                           |
| $k_{\text{fast}} = 100$                                                                                                                                       | As a simplification, three (pseudo) first-order processes considered in the model are assumed to be fast. |
| <i>Rate constants for activation processes [(molecules/cell)<sup>-1</sup> s<sup>-1</sup> except (pg/ml)<sup>-1</sup> s<sup>-1</sup> for <math>a_1</math>]</i> |                                                                                                           |
| $a_1 = 5 \times 10^{-5}$                                                                                                                                      | EGF-mediated activation of EGFR                                                                           |
| $a_2 = 10^{-7}$                                                                                                                                               | Activation of RAF by RAS-GTP                                                                              |
| $b_1 = 10^{-5}$                                                                                                                                               | Binding of EGF-activated EGFR and dephosphorylated SOS                                                    |
| $p_1 = 10^{-7}$                                                                                                                                               | Phosphorylation of MEK's activation sites by RAF                                                          |
| $p_2 = 3 \times 10^{-6}$                                                                                                                                      | Phosphorylation of ERK's activation sites by MEK                                                          |
| <i>Rate constants for deactivation processes (s<sup>-1</sup>)</i>                                                                                             |                                                                                                           |
| $d_1 = d = 0.01$                                                                                                                                              | Deactivation of EGFR                                                                                      |
| <b><math>d_2 = d</math></b>                                                                                                                                   | Deactivation of RAF (spontaneous)                                                                         |
| $u_{1A} = d$                                                                                                                                                  | Dissociation of active EGFR–SOS complex                                                                   |
| <b><math>q_1 = d</math></b>                                                                                                                                   | Dephosphorylation of MEK's activation sites                                                               |
| <b><math>q_2 = d</math></b>                                                                                                                                   | Dephosphorylation of ERK's activation sites                                                               |
| <i>Rate constants for SOS association reactions [(molecules/cell)<sup>-1</sup> s<sup>-1</sup>] and dissociation reactions (s<sup>-1</sup>)</i>                |                                                                                                           |

|                                                                                                                                                                                   |                                                                               |
|-----------------------------------------------------------------------------------------------------------------------------------------------------------------------------------|-------------------------------------------------------------------------------|
| $b_{2A} = 10^{-6}$                                                                                                                                                                | Association of SOS and RAS-GTP                                                |
| $b_{2B} = 0.1 \times b_{2A}$                                                                                                                                                      | Association of SOS and RAS-GDP                                                |
| $u_{1B} = k_{\text{fast}}$                                                                                                                                                        | Dissociation of inactive EGFR–SOS complex                                     |
| $u_{2A} = u_{2B} = 1$                                                                                                                                                             | Dissociation of SOS–RAS-GTP complex and SOS–RAS-GDP complex                   |
| <i>Rate constants associated with SOS-to-RAS positive feedback [(molecules/cell)<sup>-1</sup> s<sup>-1</sup> except s<sup>-1</sup> for <math>k_3</math> and <math>u_3</math>]</i> |                                                                               |
| $k_{2A} = 10^{-4}$                                                                                                                                                                | SOS's nucleotide-exchange activity when RAS-GTP is bound to its REM domain    |
| $k_{2B} = 0.1 \times k_{2A}$                                                                                                                                                      | SOS's nucleotide-exchange activity when RAS-GDP is bound to its REM domain    |
| $k_{2C} = 0$                                                                                                                                                                      | SOS's nucleotide-exchange activity when no RAS is bound to its REM domain     |
| $b_3 = 10^{-5}$                                                                                                                                                                   | Association of RasGAP and RAS-GTP                                             |
| $k_3 = k_{\text{fast}}$                                                                                                                                                           | RasGAP-facilitated RAS-GTP→RAS-GDP hydrolysis                                 |
| $u_3 = 0.01$                                                                                                                                                                      | Dissociation of RasGAP from RAS-GDP after hydrolysis of GTP                   |
| <i>Rate constants associated with ERK-mediated negative feedbacks [(molecules/cell)<sup>-1</sup> s<sup>-1</sup>]</i>                                                              |                                                                               |
| $p_3 = 3 \times 10^{-9}$                                                                                                                                                          | Phosphorylation of unbound SOS by active ERK                                  |
| $p_4 = p_6 = p = 6 \times 10^{-10}$                                                                                                                                               | Phosphorylation of MEK (T292 in MEK1) and RAF by active ERK                   |
| <i>Rate constants for (spontaneous) dephosphorylation reactions (s<sup>-1</sup>)</i>                                                                                              |                                                                               |
| $q_3 = q_4 = q_6 = q = 3 \times 10^{-4}$                                                                                                                                          | Dephosphorylation of inhibitory phosphosites in SOS, MEK (T292 in MEK1), RAF  |
| $q_5 = k_{\text{fast}}$                                                                                                                                                           | Dephosphorylation of MEK's activation sites when MEK's T292 is phosphorylated |
| <i>ERK activity reporters – concentrations (protein copy number per cell)</i>                                                                                                     |                                                                               |
| $\text{EKAR3}_{\text{tot}} = \text{ERKTR}_{\text{tot}} = 10^6$                                                                                                                    | Total number of EKAR3 and ERKTR molecules                                     |
| <i>ERK activity reporters – rate constants for activation reactions [(molecules/cell)<sup>-1</sup> s<sup>-1</sup>]</i>                                                            |                                                                               |
| $a_{\text{EKAR3}} = 3 \times 10^{-9}$                                                                                                                                             | EKAR3 activation rate by active ERK                                           |
| $a_{\text{ERKTR}} = 10^{-9}$                                                                                                                                                      | ERKTR activation rate by active ERK                                           |
| <i>ERK activity reporters – rate constants for deactivation reactions (s<sup>-1</sup>)</i>                                                                                        |                                                                               |
| $d_{\text{EKAR3}} = 10^{-3}$                                                                                                                                                      | EKAR3 deactivation rate                                                       |
